# Supplementary material for: Cervical carcinogenesis risk association of HPV33 E6 and E7 genetic variations in Taizhou, Southeast China
Source: Virol J. 2023 Jul 19;20:156. doi: 10.1186/s12985-023-02125-9 (PMC10354908; doi:10.1186/s12985-023-02125-9)
Supplement: Supplementary file 1 — Additional file 1. Clinical data for HPV33 study in Taizhou area, China [file 12985_2023_2125_MOESM1_ESM.xlsx]

## Sheet: Nucleotide variations of E6,E7
DNA NO.	Clinic number	Age	HPV type	HPV52 variants	sublineages	Nucleotide variations of E6 and E7 genes
1	600031835	51	HPV33 positive	33CNTZ01	A1
2	570001336	35	HPV33 positive	33CNTZ01	A1
3	119996743	41	HPV33 positive	33CNTZ01	A1
4	5001313552	40	HPV33 positive	33CNTZ01	A1
5	1091369	26	HPV33 positive	33CNTZ01	A1
6	1039554	30	HPV33 positive	33CNTZ01	A1
7	5001332501	47	HPV33 positive	33CNTZ01	A1
8	119998465	63	HPV33 positive	33CNTZ01	A1
9	370066951	45	HPV33 positive	33CNTZ01	A1
10	5000086682	26	HPV33 positive	33CNTZ01	A1
11	5001186586	26	HPV33 positive	33CNTZ01	A1
12	119999248	49	HPV33 positive	33CNTZ01	A1
13	650033952	26	HPV33 positive	33CNTZ01	A1
14	442069377	48	HPV33 positive	33CNTZ01	A1
15	442037453	47	HPV33 positive	33CNTZ01	A1
16	129990849	48	HPV33 positive	33CNTZ01	A1
17	660033716	49	HPV33 positive	33CNTZ11	A3			A213C		A273G		A364C	A387C	A446G										A862T
18	442031724	37	HPV33 positive	33CNTZ01	A1
19	119840091	33	HPV33 positive	33CNTZ11	A3			A213C		A273G		A364C	A387C	A446G										A862T
20	340058556	47	HPV33 positive	33CNTZ01	A1
21	20014229	45	HPV33 positive	33CNTZ01	A1
22	5001229010	56	HPV33 positive	33CNTZ01	A1
23	0999826101	38	HPV33 positive	33CNTZ01	A1
24	5001535697	34	HPV33 positive	33CNTZ01	A1
25	442080252	33	HPV33 positive	33CNTZ01	A1
26	5001541783	41	HPV33 positive	33CNTZ01	A1
27	5001196896	67	HPV33 positive	33CNTZ13	A3			A213C		A273G	C315T	A364C	A387C	A446G										A862T
28	129992456	35	HPV33 positive	33CNTZ01	A1
29	5001253042	27	HPV33 positive	33CNTZ15	A3			A213C	C245T	A273G		A364C	A387C	A446G	A447T									A862T
30	5000516496	48	HPV33 positive	33CNTZ01	A1
31	5001549145	42	HPV33 positive	33CNTZ01	A1
32	5001511107	28	HPV33 positive	33CNTZ01	A1
33	5001563068	57	HPV33 positive	33CNTZ01	A1
34	120200147	38	HPV33 positive	33CNTZ01	A1
35	5001570118	58	HPV33 positive	33CNTZ01	A1
36	5001571810	48	HPV33 positive	33CNTZ08	A1			A213C					A387C						T549C		C706A
37	600074350	33	HPV33 positive	33CNTZ01	A1
38	360054209	51	HPV33 positive	33CNTZ01	A1
39	5001586457	44	HPV33 positive	33CNTZ01	A1
40	1182267	49	HPV33 positive	33CNTZ02	A1																C706T
41	5001611530	25	HPV33 positive	33CNTZ01	A1
42	5001656015	58	HPV33 positive	33CNTZ01	A1
43	1182900	22	HPV33 positive	33CNTZ01	A1
44	129995125	51	HPV33 positive	33CNTZ01	A1
45	530044603	38	HPV33 positive	33CNTZ10	A2			A213C				A364C					A480T					A737G		A862T
46	5001712889	40	HPV33 positive	33CNTZ05	A1											G458T
47	340050126	32	HPV33 positive	33CNTZ01	A1
48	5001542055	51	HPV33 positive	33CNTZ01	A1
49	1207840	34	HPV33 positive	33CNTZ01	A1
50	442114306	40	HPV33 positive	33CNTZ01	A1
51	840018642	50	HPV33 positive	33CNTZ01	A1
52	5001727610	41	HPV33 positive	33CNTZ02	A1																C706T
53	0999826758	42	HPV33 positive	33CNTZ11	A3			A213C		A273G		A364C	A387C	A446G										A862T
54	5001731830	42	HPV33 positive	33CNTZ11	A3			A213C		A273G		A364C	A387C	A446G										A862T
55	129997299	37	HPV33 positive	33CNTZ10	A2			A213C				A364C					A480T					A737G		A862T
56	580025351	53	HPV33 positive	33CNTZ01	A1
57	129997851	37	HPV33 positive	33CNTZ11	A3			A213C		A273G		A364C	A387C	A446G										A862T
58	442122626	53	HPV33 positive	33CNTZ11	A3			A213C		A273G		A364C	A387C	A446G										A862T
59	129998644	70	HPV33 positive	33CNTZ01	A1
60	120340095	31	HPV33 positive	33CNTZ11	A3			A213C		A273G		A364C	A387C	A446G										A862T
61	129998779	61	HPV33 positive	33CNTZ11	A3			A213C		A273G		A364C	A387C	A446G										A862T
62	5001690691	37	HPV33 positive	33CNTZ01	A1
63	5001677319	45	HPV33 positive	33CNTZ01	A1
64	5001356278	42	HPV33 positive	33CNTZ01	A1
65	5000291465	38	HPV33 positive	33CNTZ01	A1
66	5000411103	37	HPV33 positive	33CNTZ01	A1
67	5001171314	38	HPV33 positive	33CNTZ01	A1
68	139993444	53	HPV33 positive	33CNTZ01	A1
69	121600025	41	HPV33 positive	33CNTZ04	A1			A177T
70	442117660	25	HPV33 positive	33CNTZ11	A3			A213C		A273G		A364C	A387C	A446G										A862T
71	139995035	50	HPV33 positive	33CNTZ01	A1
72	5000053418	37	HPV33 positive	33CNTZ11	A3			A213C		A273G		A364C	A387C	A446G										A862T
73	441004856	37	HPV33 positive	33CNTZ11	A3			A213C		A273G		A364C	A387C	A446G										A862T
74	470027001	39	HPV33 positive	33CNTZ01	A1
75	122480018	30	HPV33 positive	33CNTZ01	A1
76	5000079533	31	HPV33 positive	33CNTZ01	A1
77	410033727	44	HPV33 positive	33CNTZ01	A1
78	300066661	39	HPV33 positive	33CNTZ11	A3			A213C		A273G		A364C	A387C	A446G										A862T
79	5000529440	34	HPV33 positive	33CNTZ01	A1
80	5000480038	40	HPV33 positive	33CNTZ11	A3			A213C		A273G		A364C	A387C	A446G										A862T
81	5001759938	42	HPV33 positive	33CNTZ01	A1
82	5001382794	36	HPV33 positive	33CNTZ01	A1
83	260059345	44	HPV33 positive	33CNTZ01	A1
84	250091408	55	HPV33 positive	33CNTZ01	A1
85	5001801243	36	HPV33 positive	33CNTZ11	A3			A213C		A273G		A364C	A387C	A446G										A862T
86	5000625684	37	HPV33 positive	33CNTZ12	A3			A213C		A273G	C315T	A364C	A387C	A446G										A862T
87	5001415832	19	HPV33 positive	33CNTZ01	A1
88	1600036731	36	HPV33 positive	33CNTZ01	A1
89	5000668393	43	HPV33 positive	33CNTZ14	A3			A213C		A273G		A364C	A387C	A446G									C740T	A862T
90	5000555880	20	HPV33 positive	33CNTZ11	A3			A213C		A273G		A364C	A387C	A446G										A862T
91	0090809520	27	HPV33 positive	33CNTZ01	A1
92	5000695423	38	HPV33 positive	33CNTZ11	A3			A213C		A273G		A364C	A387C	A446G										A862T
93	1207427	45	HPV33 positive	33CNTZ01	A1
94	0999803591	54	HPV33 positive	33CNTZ01	A1
95	640012555	47	HPV33 positive	33CNTZ01	A1
96	5001431395	40	HPV33 positive	33CNTZ11	A3			A213C		A273G		A364C	A387C	A446G										A862T
97	5000272227	47	HPV33 positive	33CNTZ01	A1
98	0999803747	45	HPV33 positive	33CNTZ02	A1																C706T
99	5000515161	64	HPV33 positive	33CNTZ01	A1
100	0999894536	43	HPV33 positive	33CNTZ01	A1
101	5000310694	43	HPV33 positive	33CNTZ01	A1
102	159994800	53	HPV33 positive	33CNTZ01	A1
103	5000543843	42	HPV33 positive	33CNTZ01	A1
104	123540358	54	HPV33 positive	33CNTZ06	A1															A704G
105	123540344	58	HPV33 positive	33CNTZ01	A1
106	5001894151	40	HPV33 positive	33CNTZ02	A1																C706T
107	442161822	47	HPV33 positive	33CNTZ01	A1
108	119880837	53	HPV33 positive	33CNTZ01	A1
109	620036187	35	HPV33 positive	33CNTZ11	A3			A213C		A273G		A364C	A387C	A446G										A862T
110	5000778403	37	HPV33 positive	33CNTZ01	A1
111	260072433	31	HPV33 positive	33CNTZ01	A1
112	5000787446	57	HPV33 positive	33CNTZ01	A1
113	5000708058	33	HPV33 positive	33CNTZ11	A3			A213C		A273G		A364C	A387C	A446G										A862T
114	5001131563	28	HPV33 positive	33CNTZ09	A1			A213C											T549C		C706A
115	5000188747	27	HPV33 positive	33CNTZ01	A1
116	159999540	44	HPV33 positive	33CNTZ03	A1		T196G
117	442149132	40	HPV33 positive	33CNTZ11	A3			A213C		A273G		A364C	A387C	A446G										A862T
118	5001969338	25	HPV33 positive	33CNTZ01	A1
119	310066265	35	HPV33 positive	33CNTZ04	A1			A177T
120	0800010963	68	HPV33 positive	/
121	5000876954	43	HPV33 positive	33CNTZ11	A3			A213C		A273G		A364C	A387C	A446G										A862T
122	5001254953	35	HPV33 positive	33CNTZ01	A1
123	169995219	48	HPV33 positive	33CNTZ07	A1													G531A
124	5001416698	38	HPV33 positive	33CNTZ01	A1
125	5001883269	35	HPV33 positive	33CNTZ11	A3			A213C		A273G		A364C	A387C	A446G										A862T
126	00925642	61	HPV33 positive	33CNTZ11	A3			A213C		A273G		A364C	A387C	A446G										A862T
127	380064688	41	HPV33 positive	33CNTZ08	A1			A213C					A387C						T549C		C706A
128	5000923929	44	HPV33 positive	33CNTZ01	A1
129	5000874013	53	HPV33 positive	33CNTZ01	A1
130	5000885794	21	HPV33 positive	33CNTZ11	A3			A213C		A273G		A364C	A387C	A446G										A862T
131	442162753	52	HPV33 positive	33CNTZ11	A3			A213C		A273G		A364C	A387C	A446G										A862T
132	5002030922	66	HPV33 positive	33CNTZ01	A1
133	5000820598	44	HPV33 positive	33CNTZ01	A1
134	5001874176	39	HPV33 positive	33CNTZ11	A3			A213C		A273G		A364C	A387C	A446G										A862T
135	5001356380	34	HPV33 positive	33CNTZ01	A1
136	90006260	60	HPV33 positive	33CNTZ01	A1
137	9992615	45	HPV33 positive	33CNTZ01	A1
138	250076734	31	HPV33 positive	33CNTZ01	A1
139	5000219829	52	HPV33 positive	33CNTZ01	A1
140	5000325316	46	HPV33 positive	33CNTZ01	A1
141	90013686	39	HPV33 positive	33CNTZ11	A3			A213C		A273G		A364C	A387C	A446G										A862T
142	5001403975	43	HPV33 positive	/
143	410020645	54	HPV33 positive	33CNTZ01	A1
144	1219496	33	HPV33 positive	33CNTZ01	A1
145	90016452	56	HPV33 positive	33CNTZ01	A1
146	5001878474	43	HPV33 positive	33CNTZ01	A1
147	5001795942	42	HPV33 positive	33CNTZ01	A1
148	380023517	36	HPV33 positive	33CNTZ01	A1
149	5002161910	37	HPV33 positive	33CNTZ01	A1
150	5000529861	43	HPV33 positive	33CNTZ01	A1
151	1079332	37	HPV33 positive	33CNTZ01	A1
152	5000391180	38	HPV33 positive	33CNTZ01	A1
153	470025792	47	HPV33 positive	33CNTZ01	A1
154	580028155	37	HPV33 positive	33CNTZ01	A1
155	5002227489	73	HPV33 positive	/
156	5002238669	27	HPV33 positive	33CNTZ13	A3			A213C		A273G	C315T	A364C	A387C	A446G										A862T
157	5001311476	40	HPV33 positive	33CNTZ01	A1
158	5001326459	36	HPV33 positive	33CNTZ11	A3			A213C		A273G		A364C	A387C	A446G										A862T
159	330004752	38	HPV33 positive	33CNTZ01	A1
160	0090828324	30	HPV33 positive	33CNTZ01	A1
161	5000392830	60	HPV33 positive	33CNTZ01	A1
162	340073215	55	HPV33 positive	33CNTZ01	A1
163	442159746	51	HPV33 positive	33CNTZ11	A3			A213C		A273G		A364C	A387C	A446G										A862T
164	5002344990	23	HPV33 positive	33CNTZ01	A1
165	5002358960	21	HPV33 positive	33CNTZ01	A1
166	5002367796	54	HPV33 positive	33CNTZ11	A3			A213C		A273G		A364C	A387C	A446G										A862T
167	5000651784	62	HPV33 positive	33CNTZ11	A3			A213C		A273G		A364C	A387C	A446G										A862T
168	5000680357	56	HPV33 positive	33CNTZ02	A1																C706T
169	5001953170	27	HPV33 positive	33CNTZ01	A1
170	0090872707	24	HPV33 positive	33CNTZ01	A1
171	5002393528	45	HPV33 positive	33CNTZ01	A1
172	5000636612	44	HPV33 positive	33CNTZ11	A3			A213C		A273G		A364C	A387C	A446G										A862T
173	380067965	59	HPV33 positive	33CNTZ01	A1
174	90828325	31	HPV33 positive	33CNTZ01	A1
175	5000636617	44	HPV33 positive	33CNTZ11	A3			A213C		A273G		A364C	A387C	A446G										A862T
176	1205567	56	HPV33 positive	33CNTZ01	A1
177	5001527583	42	HPV33 positive	33CNTZ01	A1
178	5000742399	47	HPV33 positive	33CNTZ11	A3			A213C		A273G		A364C	A387C	A446G										A862T
179	5002371961	36	HPV33 positive	33CNTZ01	A1
180	5001255665	56	HPV33 positive	/
181	5001976048	51	HPV33 positive	33CNTZ01	A1
182	90832360	36	HPV33 positive	33CNTZ01	A1
183	5001829998	57	HPV33 positive	33CNTZ12	A3			A213C		A273G	C315T	A364C	A387C	A446G										A862T
184	442163574	39	HPV33 positive	33CNTZ11	A3			A213C		A273G		A364C	A387C	A446G										A862T
185	0090832358	37	HPV33 positive	33CNTZ01	A1
186	0090860772	33	HPV33 positive	33CNTZ11	A3			A213C		A273G		A364C	A387C	A446G										A862T
187	5002758668	26	HPV33 positive	33CNTZ01	A1
188	6001478223	69	HPV33 positive	33CNTZ11	A3			A213C		A273G		A364C	A387C	A446G										A862T
189	6001549433	35	HPV33 positive	33CNTZ01	A1

## Sheet: Histological Diagnoses Data
DNA NO.	Clinic number	Age	HPV type	HPV52 variants	sublineages	Histological Diagnoses
1	600031835	51	HPV33 positive	33CNTZ01	A1	Normal
2	570001336	35	HPV33 positive	33CNTZ01	A1
3	119996743	41	HPV33 positive	33CNTZ01	A1
4	5001313552	40	HPV33 positive	33CNTZ01	A1
5	1091369	26	HPV33 positive	33CNTZ01	A1
6	1039554	30	HPV33 positive	33CNTZ01	A1	Normal
7	5001332501	47	HPV33 positive	33CNTZ01	A1	Normal
8	119998465	63	HPV33 positive	33CNTZ01	A1
9	370066951	45	HPV33 positive	33CNTZ01	A1	Normal
10	5000086682	26	HPV33 positive	33CNTZ01	A1	Normal
11	5001186586	26	HPV33 positive	33CNTZ01	A1	CIN1
12	119999248	49	HPV33 positive	33CNTZ01	A1
13	650033952	26	HPV33 positive	33CNTZ01	A1
14	442069377	48	HPV33 positive	33CNTZ01	A1	CIN2
15	442037453	47	HPV33 positive	33CNTZ01	A1	CIN1
16	129990849	48	HPV33 positive	33CNTZ01	A1
17	660033716	49	HPV33 positive	33CNTZ11	A3	CIN3
18	442031724	37	HPV33 positive	33CNTZ01	A1	CIN2
19	119840091	33	HPV33 positive	33CNTZ11	A3
20	340058556	47	HPV33 positive	33CNTZ01	A1	Normal
21	20014229	45	HPV33 positive	33CNTZ01	A1	CIN3
22	5001229010	56	HPV33 positive	33CNTZ01	A1	Normal
23	0999826101	38	HPV33 positive	33CNTZ01	A1
24	5001535697	34	HPV33 positive	33CNTZ01	A1	CIN1
25	442080252	33	HPV33 positive	33CNTZ01	A1	CIN3
26	5001541783	41	HPV33 positive	33CNTZ01	A1	CIN2
27	5001196896	67	HPV33 positive	33CNTZ13	A3	Normal
28	129992456	35	HPV33 positive	33CNTZ01	A1
29	5001253042	27	HPV33 positive	33CNTZ15	A3	Normal
30	5000516496	48	HPV33 positive	33CNTZ01	A1	CIN3
31	5001549145	42	HPV33 positive	33CNTZ01	A1
32	5001511107	28	HPV33 positive	33CNTZ01	A1
33	5001563068	57	HPV33 positive	33CNTZ01	A1	Normal
34	120200147	38	HPV33 positive	33CNTZ01	A1
35	5001570118	58	HPV33 positive	33CNTZ01	A1
36	5001571810	48	HPV33 positive	33CNTZ08	A1	CIN3
37	600074350	33	HPV33 positive	33CNTZ01	A1	CIN1
38	360054209	51	HPV33 positive	33CNTZ01	A1
39	5001586457	44	HPV33 positive	33CNTZ01	A1	Normal
40	1182267	49	HPV33 positive	33CNTZ02	A1
41	5001611530	25	HPV33 positive	33CNTZ01	A1
42	5001656015	58	HPV33 positive	33CNTZ01	A1
43	1182900	22	HPV33 positive	33CNTZ01	A1	Normal
44	129995125	51	HPV33 positive	33CNTZ01	A1
45	530044603	38	HPV33 positive	33CNTZ10	A2	CIN2
46	5001712889	40	HPV33 positive	33CNTZ05	A1	Normal
47	340050126	32	HPV33 positive	33CNTZ01	A1	Normal
48	5001542055	51	HPV33 positive	33CNTZ01	A1	CIN2
49	1207840	34	HPV33 positive	33CNTZ01	A1	Normal
50	442114306	40	HPV33 positive	33CNTZ01	A1
51	840018642	50	HPV33 positive	33CNTZ01	A1	CIN2
52	5001727610	41	HPV33 positive	33CNTZ02	A1	CIN3
53	0999826758	42	HPV33 positive	33CNTZ11	A3
54	5001731830	42	HPV33 positive	33CNTZ11	A3	Normal
55	129997299	37	HPV33 positive	33CNTZ10	A2
56	580025351	53	HPV33 positive	33CNTZ01	A1	Normal
57	129997851	37	HPV33 positive	33CNTZ11	A3
58	442122626	53	HPV33 positive	33CNTZ11	A3	CIN3
59	129998644	70	HPV33 positive	33CNTZ01	A1
60	120340095	31	HPV33 positive	33CNTZ11	A3
61	129998779	61	HPV33 positive	33CNTZ11	A3
62	5001690691	37	HPV33 positive	33CNTZ01	A1	Normal
63	5001677319	45	HPV33 positive	33CNTZ01	A1	Normal
64	5001356278	42	HPV33 positive	33CNTZ01	A1	CIN3
65	5000291465	38	HPV33 positive	33CNTZ01	A1	CIN3
66	5000411103	37	HPV33 positive	33CNTZ01	A1	CIN2
67	5001171314	38	HPV33 positive	33CNTZ01	A1	CIN1
68	139993444	53	HPV33 positive	33CNTZ01	A1
69	121600025	41	HPV33 positive	33CNTZ04	A1
70	442117660	25	HPV33 positive	33CNTZ11	A3	CIN1
71	139995035	50	HPV33 positive	33CNTZ01	A1
72	5000053418	37	HPV33 positive	33CNTZ11	A3	Normal
73	441004856	37	HPV33 positive	33CNTZ11	A3	Normal
74	470027001	39	HPV33 positive	33CNTZ01	A1
75	122480018	30	HPV33 positive	33CNTZ01	A1
76	5000079533	31	HPV33 positive	33CNTZ01	A1
77	410033727	44	HPV33 positive	33CNTZ01	A1	CIN1
78	300066661	39	HPV33 positive	33CNTZ11	A3	Normal
79	5000529440	34	HPV33 positive	33CNTZ01	A1	CIN3
80	5000480038	40	HPV33 positive	33CNTZ11	A3	CIN3
81	5001759938	42	HPV33 positive	33CNTZ01	A1	Normal
82	5001382794	36	HPV33 positive	33CNTZ01	A1	Normal
83	260059345	44	HPV33 positive	33CNTZ01	A1	Normal
84	250091408	55	HPV33 positive	33CNTZ01	A1	CIN2
85	5001801243	36	HPV33 positive	33CNTZ11	A3	Normal
86	5000625684	37	HPV33 positive	33CNTZ12	A3	Normal
87	5001415832	19	HPV33 positive	33CNTZ01	A1
88	1600036731	36	HPV33 positive	33CNTZ01	A1	Normal
89	5000668393	43	HPV33 positive	33CNTZ14	A3	Normal
90	5000555880	20	HPV33 positive	33CNTZ11	A3
91	0090809520	27	HPV33 positive	33CNTZ01	A1
92	5000695423	38	HPV33 positive	33CNTZ11	A3
93	1207427	45	HPV33 positive	33CNTZ01	A1	CIN1
94	0999803591	54	HPV33 positive	33CNTZ01	A1
95	640012555	47	HPV33 positive	33CNTZ01	A1	Normal
96	5001431395	40	HPV33 positive	33CNTZ11	A3	Normal
97	5000272227	47	HPV33 positive	33CNTZ01	A1	Normal
98	0999803747	45	HPV33 positive	33CNTZ02	A1
99	5000515161	64	HPV33 positive	33CNTZ01	A1	Normal
100	0999894536	43	HPV33 positive	33CNTZ01	A1
101	5000310694	43	HPV33 positive	33CNTZ01	A1	CIN2
102	159994800	53	HPV33 positive	33CNTZ01	A1
103	5000543843	42	HPV33 positive	33CNTZ01	A1	Normal
104	123540358	54	HPV33 positive	33CNTZ06	A1
105	123540344	58	HPV33 positive	33CNTZ01	A1
106	5001894151	40	HPV33 positive	33CNTZ02	A1	CIN2
107	442161822	47	HPV33 positive	33CNTZ01	A1	Normal
108	119880837	53	HPV33 positive	33CNTZ01	A1
109	620036187	35	HPV33 positive	33CNTZ11	A3	CIN1
110	5000778403	37	HPV33 positive	33CNTZ01	A1	CIN2
111	260072433	31	HPV33 positive	33CNTZ01	A1
112	5000787446	57	HPV33 positive	33CNTZ01	A1	CIN3
113	5000708058	33	HPV33 positive	33CNTZ11	A3
114	5001131563	28	HPV33 positive	33CNTZ09	A1	Normal
115	5000188747	27	HPV33 positive	33CNTZ01	A1
116	159999540	44	HPV33 positive	33CNTZ03	A1
117	442149132	40	HPV33 positive	33CNTZ11	A3	Normal
118	5001969338	25	HPV33 positive	33CNTZ01	A1	Normal
119	310066265	35	HPV33 positive	33CNTZ04	A1
120	0800010963	68	HPV33 positive			Normal
121	5000876954	43	HPV33 positive	33CNTZ11	A3
122	5001254953	35	HPV33 positive	33CNTZ01	A1	CIN3
123	169995219	48	HPV33 positive	33CNTZ07	A1
124	5001416698	38	HPV33 positive	33CNTZ01	A1	CIN3
125	5001883269	35	HPV33 positive	33CNTZ11	A3
126	00925642	61	HPV33 positive	33CNTZ11	A3
127	380064688	41	HPV33 positive	33CNTZ08	A1	Normal
128	5000923929	44	HPV33 positive	33CNTZ01	A1
129	5000874013	53	HPV33 positive	33CNTZ01	A1	Normal
130	5000885794	21	HPV33 positive	33CNTZ11	A3	Normal
131	442162753	52	HPV33 positive	33CNTZ11	A3	CIN2
132	5002030922	66	HPV33 positive	33CNTZ01	A1	Normal
133	5000820598	44	HPV33 positive	33CNTZ01	A1	Normal
134	5001874176	39	HPV33 positive	33CNTZ11	A3	Normal
135	5001356380	34	HPV33 positive	33CNTZ01	A1	CIN1
136	90006260	60	HPV33 positive	33CNTZ01	A1
137	9992615	45	HPV33 positive	33CNTZ01	A1	CIN1
138	250076734	31	HPV33 positive	33CNTZ01	A1	Normal
139	5000219829	52	HPV33 positive	33CNTZ01	A1	CIN3
140	5000325316	46	HPV33 positive	33CNTZ01	A1	CIN1
141	90013686	39	HPV33 positive	33CNTZ11	A3	CIN2
142	5001403975	43	HPV33 positive			CIN1
143	410020645	54	HPV33 positive	33CNTZ01	A1
144	1219496	33	HPV33 positive	33CNTZ01	A1	Normal
145	90016452	56	HPV33 positive	33CNTZ01	A1
146	5001878474	43	HPV33 positive	33CNTZ01	A1	Normal
147	5001795942	42	HPV33 positive	33CNTZ01	A1	CIN2
148	380023517	36	HPV33 positive	33CNTZ01	A1
149	5002161910	37	HPV33 positive	33CNTZ01	A1	CIN3
150	5000529861	43	HPV33 positive	33CNTZ01	A1
151	1079332	37	HPV33 positive	33CNTZ01	A1
152	5000391180	38	HPV33 positive	33CNTZ01	A1	CIN3
153	470025792	47	HPV33 positive	33CNTZ01	A1	CIN3
154	580028155	37	HPV33 positive	33CNTZ01	A1	CIN3
155	5002227489	73	HPV33 positive
156	5002238669	27	HPV33 positive	33CNTZ13	A3	Normal
157	5001311476	40	HPV33 positive	33CNTZ01	A1
158	5001326459	36	HPV33 positive	33CNTZ11	A3	CIN1
159	330004752	38	HPV33 positive	33CNTZ01	A1
160	0090828324	30	HPV33 positive	33CNTZ01	A1
161	5000392830	60	HPV33 positive	33CNTZ01	A1	Normal
162	340073215	55	HPV33 positive	33CNTZ01	A1	Normal
163	442159746	51	HPV33 positive	33CNTZ11	A3	Normal
164	5002344990	23	HPV33 positive	33CNTZ01	A1
165	5002358960	21	HPV33 positive	33CNTZ01	A1	CIN3
166	5002367796	54	HPV33 positive	33CNTZ11	A3	CIN2
167	5000651784	62	HPV33 positive	33CNTZ11	A3	Normal
168	5000680357	56	HPV33 positive	33CNTZ02	A1	CIN1
169	5001953170	27	HPV33 positive	33CNTZ01	A1	CIN1
170	0090872707	24	HPV33 positive	33CNTZ01	A1
171	5002393528	45	HPV33 positive	33CNTZ01	A1
172	5000636612	44	HPV33 positive	33CNTZ11	A3
173	380067965	59	HPV33 positive	33CNTZ01	A1	Normal
174	90828325	31	HPV33 positive	33CNTZ01	A1
175	5000636617	44	HPV33 positive	33CNTZ11	A3
176	1205567	56	HPV33 positive	33CNTZ01	A1	Normal
177	5001527583	42	HPV33 positive	33CNTZ01	A1	CIN1
178	5000742399	47	HPV33 positive	33CNTZ11	A3	Normal
179	5002371961	36	HPV33 positive	33CNTZ01	A1	Normal
180	5001255665	56	HPV33 positive			CIN2
181	5001976048	51	HPV33 positive	33CNTZ01	A1
182	90832360	36	HPV33 positive	33CNTZ01	A1
183	5001829998	57	HPV33 positive	33CNTZ12	A3	CIN1
184	442163574	39	HPV33 positive	33CNTZ11	A3
185	0090832358	37	HPV33 positive	33CNTZ01	A1
186	0090860772	33	HPV33 positive	33CNTZ11	A3
187	5002758668	26	HPV33 positive	33CNTZ01	A1
188	6001478223	69	HPV33 positive	33CNTZ11	A3	Normal
189	6001549433	35	HPV33 positive	33CNTZ01	A1	CIN2
